# Supplementary material for: Nitrogen-doped carbon nanotube sponge with embedded Fe/Fe3C nanoparticles as binder-free cathodes for high capacity lithium–sulfur batteries
Source: Royal Society of Chemistry journal article supplement (doi:10.1039/c8ta06040a), 2018-01-01
Supplement: c8ta06040a1.pdf [file c8ta06040a1.pdf]

## Supporting Information

### **Nitrogen-Doped Carbon Nanotube Sponge with embedded Fe/Fe<sub>3</sub>C nanoparticles as Binder-Free Cathodes for High Capacity Lithium–Sulfur Batteries**

Yu-Si Liu<sup>a</sup>, Chao Ma<sup>a</sup>, Yu-Lin Bai<sup>a</sup>, Xue-Yan Wu<sup>a</sup>, Qian-Chen Zhu<sup>a</sup>, Xin Liu<sup>a</sup>, Xin-Hua Liang<sup>b</sup>, Xiao Wei<sup>a</sup>, Kai-Xue Wang<sup>a\*</sup>, and Jie-Sheng Chen<sup>a\*</sup>

<sup>a</sup>Shanghai Electrochemical Energy Devices Research Center, School of Chemistry and Chemical Engineering, Shanghai Jiao Tong University, Shanghai 200240, P. R. China

<sup>b</sup>Guangxi Key Laboratory of Automobile Components and Vehicle Technology, Guangxi University of Science and Technology, Liuzhou 545600, P. R. China

\*Corresponding author: [k.wang@sjtu.edu.cn](mailto:k.wang@sjtu.edu.cn) (KXW); [chemcj@sjtu.edu.cn](mailto:chemcj@sjtu.edu.cn) (JSC)

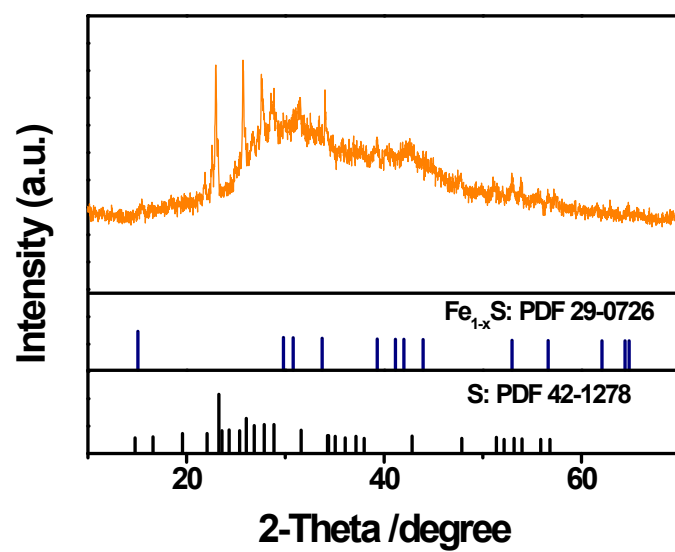

Figure S1. XRD patterns of Fe/Fe<sub>3</sub>C@N-CNT/S-2

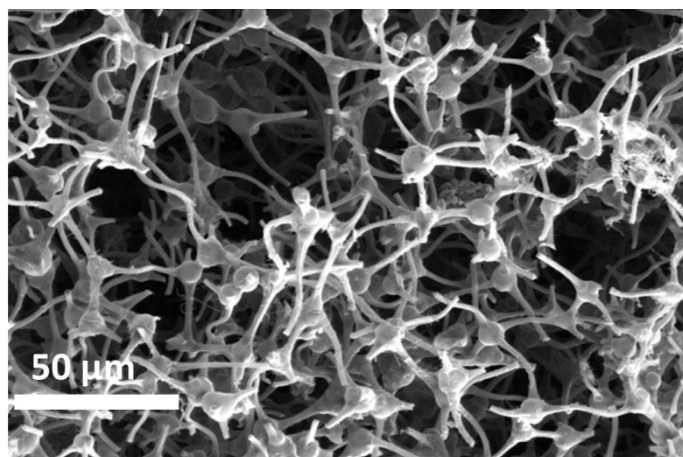

Figure S2. SEM image of the carbonized melamine sponge (CMS).

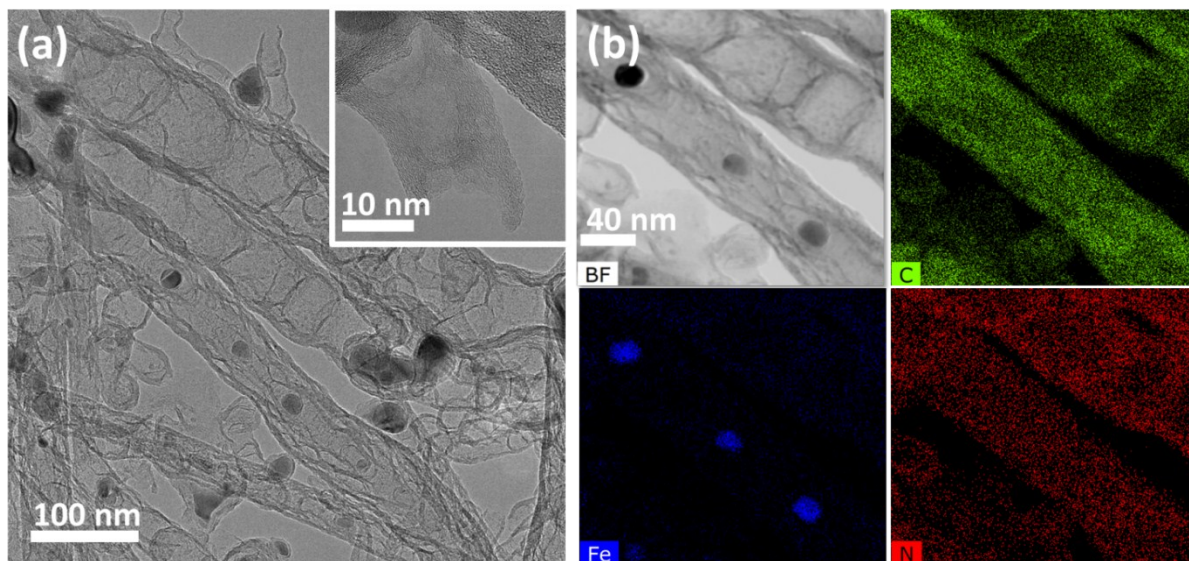

Figure S3. (a) TEM image of Fe/Fe<sub>3</sub>C@N-CNT, the inset in (a) is the HRTEM of N-CNT, (b) EDS elemental mapping of Fe/Fe<sub>3</sub>C@N-CNT.

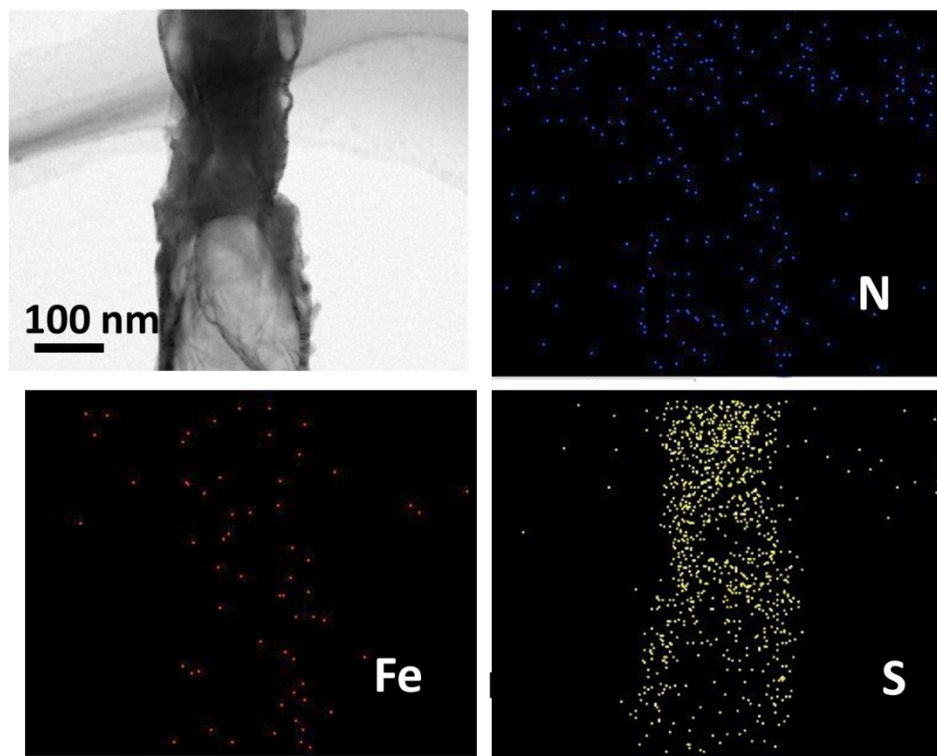

Figure S4. EDS elemental mapping of Fe/Fe<sub>3</sub>C@N-CNT/S.

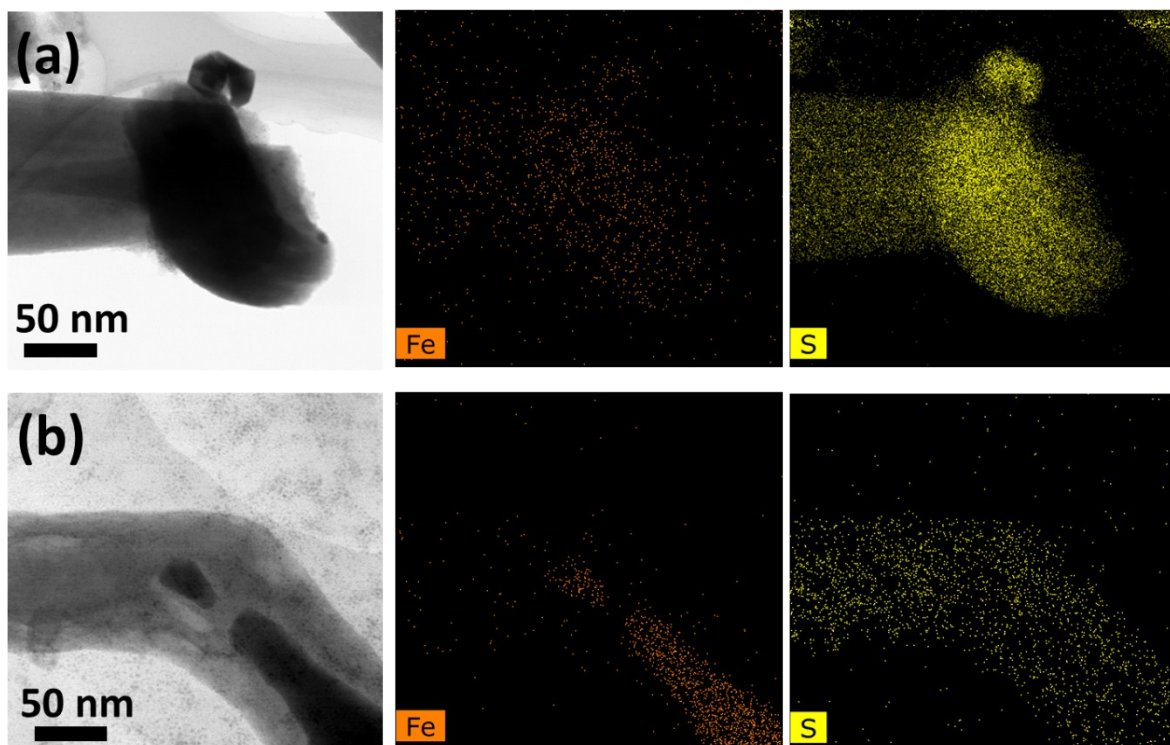

Figure S5. EDS elemental mapping of Fe/Fe<sub>3</sub>C@N-CNT/S after (a) discharge down to 1.7 V,  
(b) charge to 2.8 V

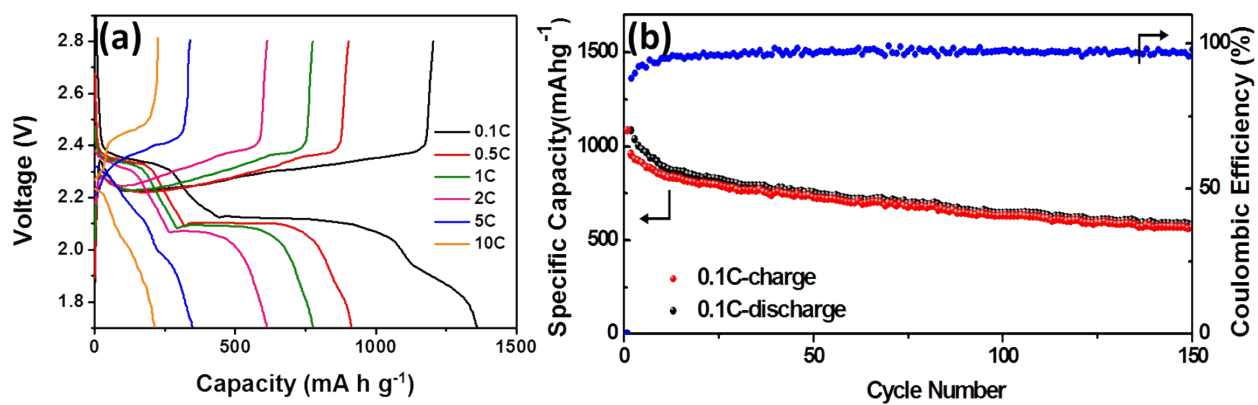

Figure S6. (a) Charge/discharge curves of Fe/Fe<sub>3</sub>C@N-CNT/S under different current rate, (b) cyclic performance of Fe/Fe<sub>3</sub>C@N-CNT/S composite electrode when charged/discharged at 0.1 C.

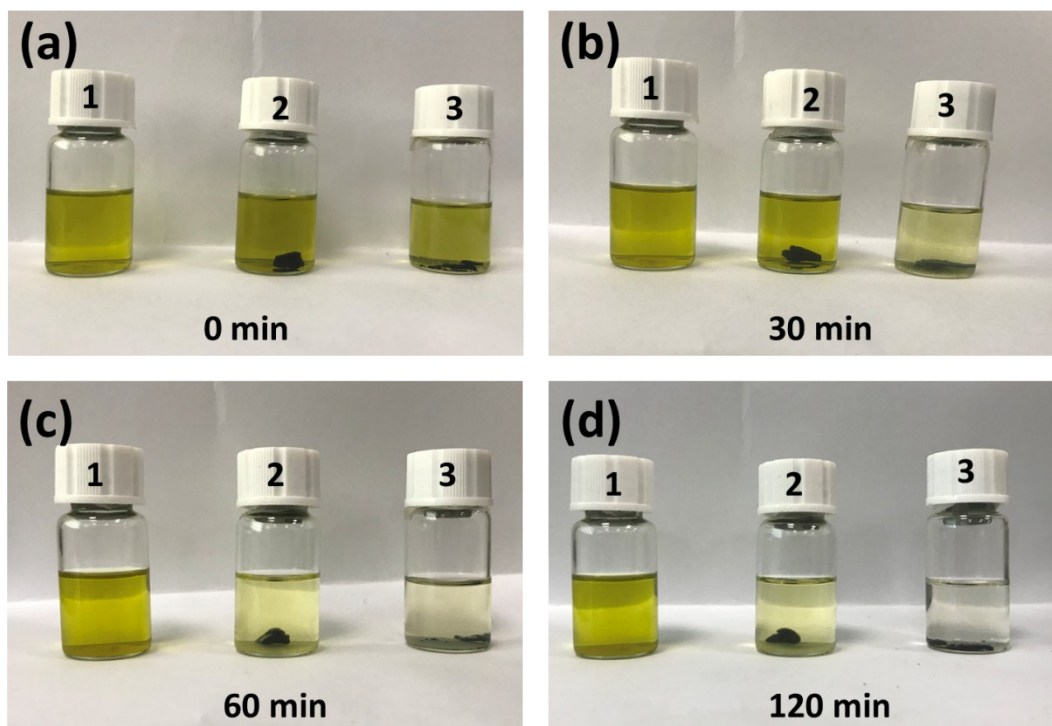

Figure S7. Visual comparison of the  $\text{Li}_2\text{S}_6$  solution for polysulfide entrapment of (1)  $\text{Li}_2\text{S}_6$  solution, (2)  $\text{Li}_2\text{S}_6$  solution with CMS, (3)  $\text{Li}_2\text{S}_6$  solution with  $\text{Fe}/\text{Fe}_3\text{C}@\text{N-CNT}$ .
